# Supplementary material for: Concerning RNA-guided gene drives for the alteration of wild populations
Source: eLife journal article supplement (doi:10.7554/elife.03401), 2014-07-17
Supplement: supp [file elife-03401-supp-v2.zip]

**Experiments performed before constructing a competent drive**

Evaluate candidate target sequences for cutting efficiency and specificity  
Evaluate candidate guide RNAs vs equivalent sequences in related species  
Measure the fitness effects of expressing Cas9 + guide RNAs on the organism  
Build a 'dependent' cassette with guide RNAs targeting a unique sequence and no Cas9  
Calculate homing efficiency in Cas9-expressing organisms with the unique sequence added  
Determine whether the guide RNAs to be used can cut the relevant loci of related species  
Generate organisms bearing the proposed genomic alterations without the drive  
Measure the fitness effects of the genomic alterations in the laboratory  
Evaluate the stability of non-drive cassettes and genomic alterations in the laboratory  
Model gene drive spread and population-level effects using laboratory non-drive data  
Run contained field trials to measure fitness of non-drive alterations in the wild  
Run contained field trials to measure ecological impact of non-drive alterations in the wild  
Model gene drive spread and population-level effects using field non-drive data

**Relative Ecological Risk**

Negligible  
Negligible  
Negligible  
Negligible  
Negligible  
Negligible  
Negligible  
Negligible  
None  
Minor  
Minor  
None

**Experiments performed after drive construction**

Build and test the drive in a laboratory whose location affords ecological containment  
Measure the rate of drive spread through laboratory populations  
Test the rate of spread and effectiveness of reversal drives in the laboratory  
Test the rate of spread and effectiveness of immunizing drives in the laboratory  
Evaluate drive stability during the spreading process in the laboratory  
Evaluate drive stability after reaching fixation in the laboratory  
Determine whether the drive can spread into the loci of related species in the laboratory  
Model gene drive spread and population-level effects using laboratory drive data  
Run contained field trials to evaluate all the characteristics listed above  
Run contained field trials of an autonomously spreading population suppression drive  
Model gene drive spread and population-level effects using available drive data

Negligible  
Moderate  
Moderate  
Moderate  
Moderate  
Moderate  
Moderate  
None  
Moderate-High  
High  
None

**Experiments releasing a “neutral” drive that makes no other changes**

Determine whether the drive mechanism itself has any ecological impact  
Measure gene flow in the target wild population  
Determine whether two successive drives can recode all members of the population

Moderate  
Moderate  
Moderate
