# Supplementary material for: Concerning RNA-guided gene drives for the alteration of wild populations
Source: eLife journal article supplement (doi:10.7554/elife.03401), 2014-07-17
Supplement: supp [file elife-03401-supp-v2.zip]

| <b>Class of Intervention</b>    | <b>Existing Technology</b>                                                                                                           | <b>Additional Challenges</b>                                                                                                                                                                              |
|---------------------------------|--------------------------------------------------------------------------------------------------------------------------------------|-----------------------------------------------------------------------------------------------------------------------------------------------------------------------------------------------------------|
| <b>Optimize Cutting</b>         | Target multiple sites                                                                                                                | Eliminate guide RNA repetitiveness                                                                                                                                                                        |
| <b>Minimize Fitness Cost</b>    | Use paired nickases<br>Use truncated guide RNAs<br>Use Cas9-FokI fusion                                                              | Need twice as many guide RNAs<br>Express truncated guide RNAs<br>Need twice as many guide RNAs                                                                                                            |
| <b>Avoid Resistant Alleles</b>  | Target important genes<br>Target multiple sites                                                                                      | Ensure recoded version is viable<br>Eliminate guide RNA repetitiveness                                                                                                                                    |
| <b>Eliminate Repetitiveness</b> | Use alternative promoters<br>Use guide RNA variants<br>Multiple guides per promoter<br>Invert and separate repeats                   | Confirm activity in each species<br>Determine most divergent set of variants<br>None known<br>Could cause problems for subsequent drives                                                                  |
| <b>Optimize HR</b>              | Generate optimal overhang<br>Cut during optimal cell stage<br>Activate HR genes<br>Repress NHEJ genes<br>Tether HR proteins near cut | Determine optimal overhang<br>Identify optimal stage, promoter for species<br>Optimize timing and verify effectiveness<br>Optimize timing and verify effectiveness<br>Determine whether this increases HR |
