# Supplementary material for: Concerning RNA-guided gene drives for the alteration of wild populations
Source: eLife journal article supplement (doi:10.7554/elife.03401), 2014-07-17
Supplement: supp [file elife-03401-supp-v2.zip]

| Type of Drive       | Technical Limitations and Evolutionary Stability                                                                                                                                                                                                                                                                                                                                                                                                                            |
|---------------------|-----------------------------------------------------------------------------------------------------------------------------------------------------------------------------------------------------------------------------------------------------------------------------------------------------------------------------------------------------------------------------------------------------------------------------------------------------------------------------|
| <b>Reversal</b>     | Cannot reverse changes to sequences that are not currently important for fitness                                                                                                                                                                                                                                                                                                                                                                                            |
| <b>Immunization</b> | Cannot block gene drives aiming to disrupt genes currently unimportant for fitness<br>Drives immunizing organisms against viruses are stable if viral infection is costly                                                                                                                                                                                                                                                                                                   |
| <b>Precision</b>    | Can only generate unique sequences using genes important for fitness                                                                                                                                                                                                                                                                                                                                                                                                        |
| <b>Sensitizing</b>  | Most genes in which mutations confer resistance will be important for fitness<br>If not, NHEJ events leading to drive-resistant alleles will disrupt the gene and block resistance<br>The drive will not spread in the presence of strong selection by the relevant compound<br>Will require local untreated areas to use as reservoirs from which to spread sensitivity<br>Newly sensitizing genes carried as cargo will not be stable unless they replace important genes |
| <b>Interacting</b>  | Individual drives are evolutionarily stable, but the combined effect is not                                                                                                                                                                                                                                                                                                                                                                                                 |
| <b>Genetic Load</b> | Evolutionarily stable but dispersal, mating patterns and ecological factors will be important                                                                                                                                                                                                                                                                                                                                                                               |
| <b>Y-drive</b>      | Evolutionarily stable but dispersal, mating patterns and ecological factors will be important                                                                                                                                                                                                                                                                                                                                                                               |
