# Supplementary material for: Concerning RNA-guided gene drives for the alteration of wild populations
Source: eLife journal article supplement (doi:10.7554/elife.03401), 2014-07-17
Supplement: supp [file elife-03401-supp-v2.zip]

| Type of Drive                | Technical Challenge                                                | Risk of Spread                    | Ecological Risk                                               | Reversibility                                                   |
|------------------------------|--------------------------------------------------------------------|-----------------------------------|---------------------------------------------------------------|-----------------------------------------------------------------|
| <b>Sensitization</b>         | <b>Varies</b>                                                      | <b>High</b>                       | <b>Negligible</b><br>(no effect without molecule)             | <b>High</b><br>(restorative drive)                              |
| <b>Sterile Daughter (SD)</b> | <b>Easy</b>                                                        | <b>None</b><br>(not a true drive) | <b>Negligible</b><br>(does not drive)                         | <b>Automatic</b><br>(will happen naturally)                     |
| <b>Multiple Drive SD</b>     | <b>Easy-Medium</b>                                                 | <b>High</b>                       | <b>Low</b><br>(individual drives are harmless)                | <b>High</b><br>(reversal drive)                                 |
| <b>Sex-determining gene</b>  | <b>Easy</b><br>(in eligible species)                               | <b>High</b>                       | <b>Low</b><br>(quickly degrades)                              | <b>Automatic</b><br>(will happen naturally)                     |
| <b>Meiotic Y-drive</b>       | <b>Medium-Difficult</b><br>(Cas9 activity only during pre-meiosis) | <b>High</b>                       | <b>High</b><br>(possible extinction)                          | <b>Medium</b><br>(immunizing drive)                             |
| <b>Genetic Load</b>          | <b>Medium</b><br>(Cas9 activity only in late germline cells)       | <b>High</b>                       | <b>High</b><br>(precipitous decline with possible extinction) | <b>Low-Medium</b><br>(immunizing drive before population crash) |
| <b>Y-drive + SD</b>          | <b>Medium</b><br>(multiple modifications)                          | <b>High</b>                       | <b>Medium</b><br>(high without using an immunizing drive)     | <b>Medium</b><br>(immunizing drive + reversal drive)            |
