# Supplementary figures and images for: Concerning RNA-guided gene drives for the alteration of wild populations
Source: eLife journal article supplement (doi:10.7554/elife.03401), 2014-07-17

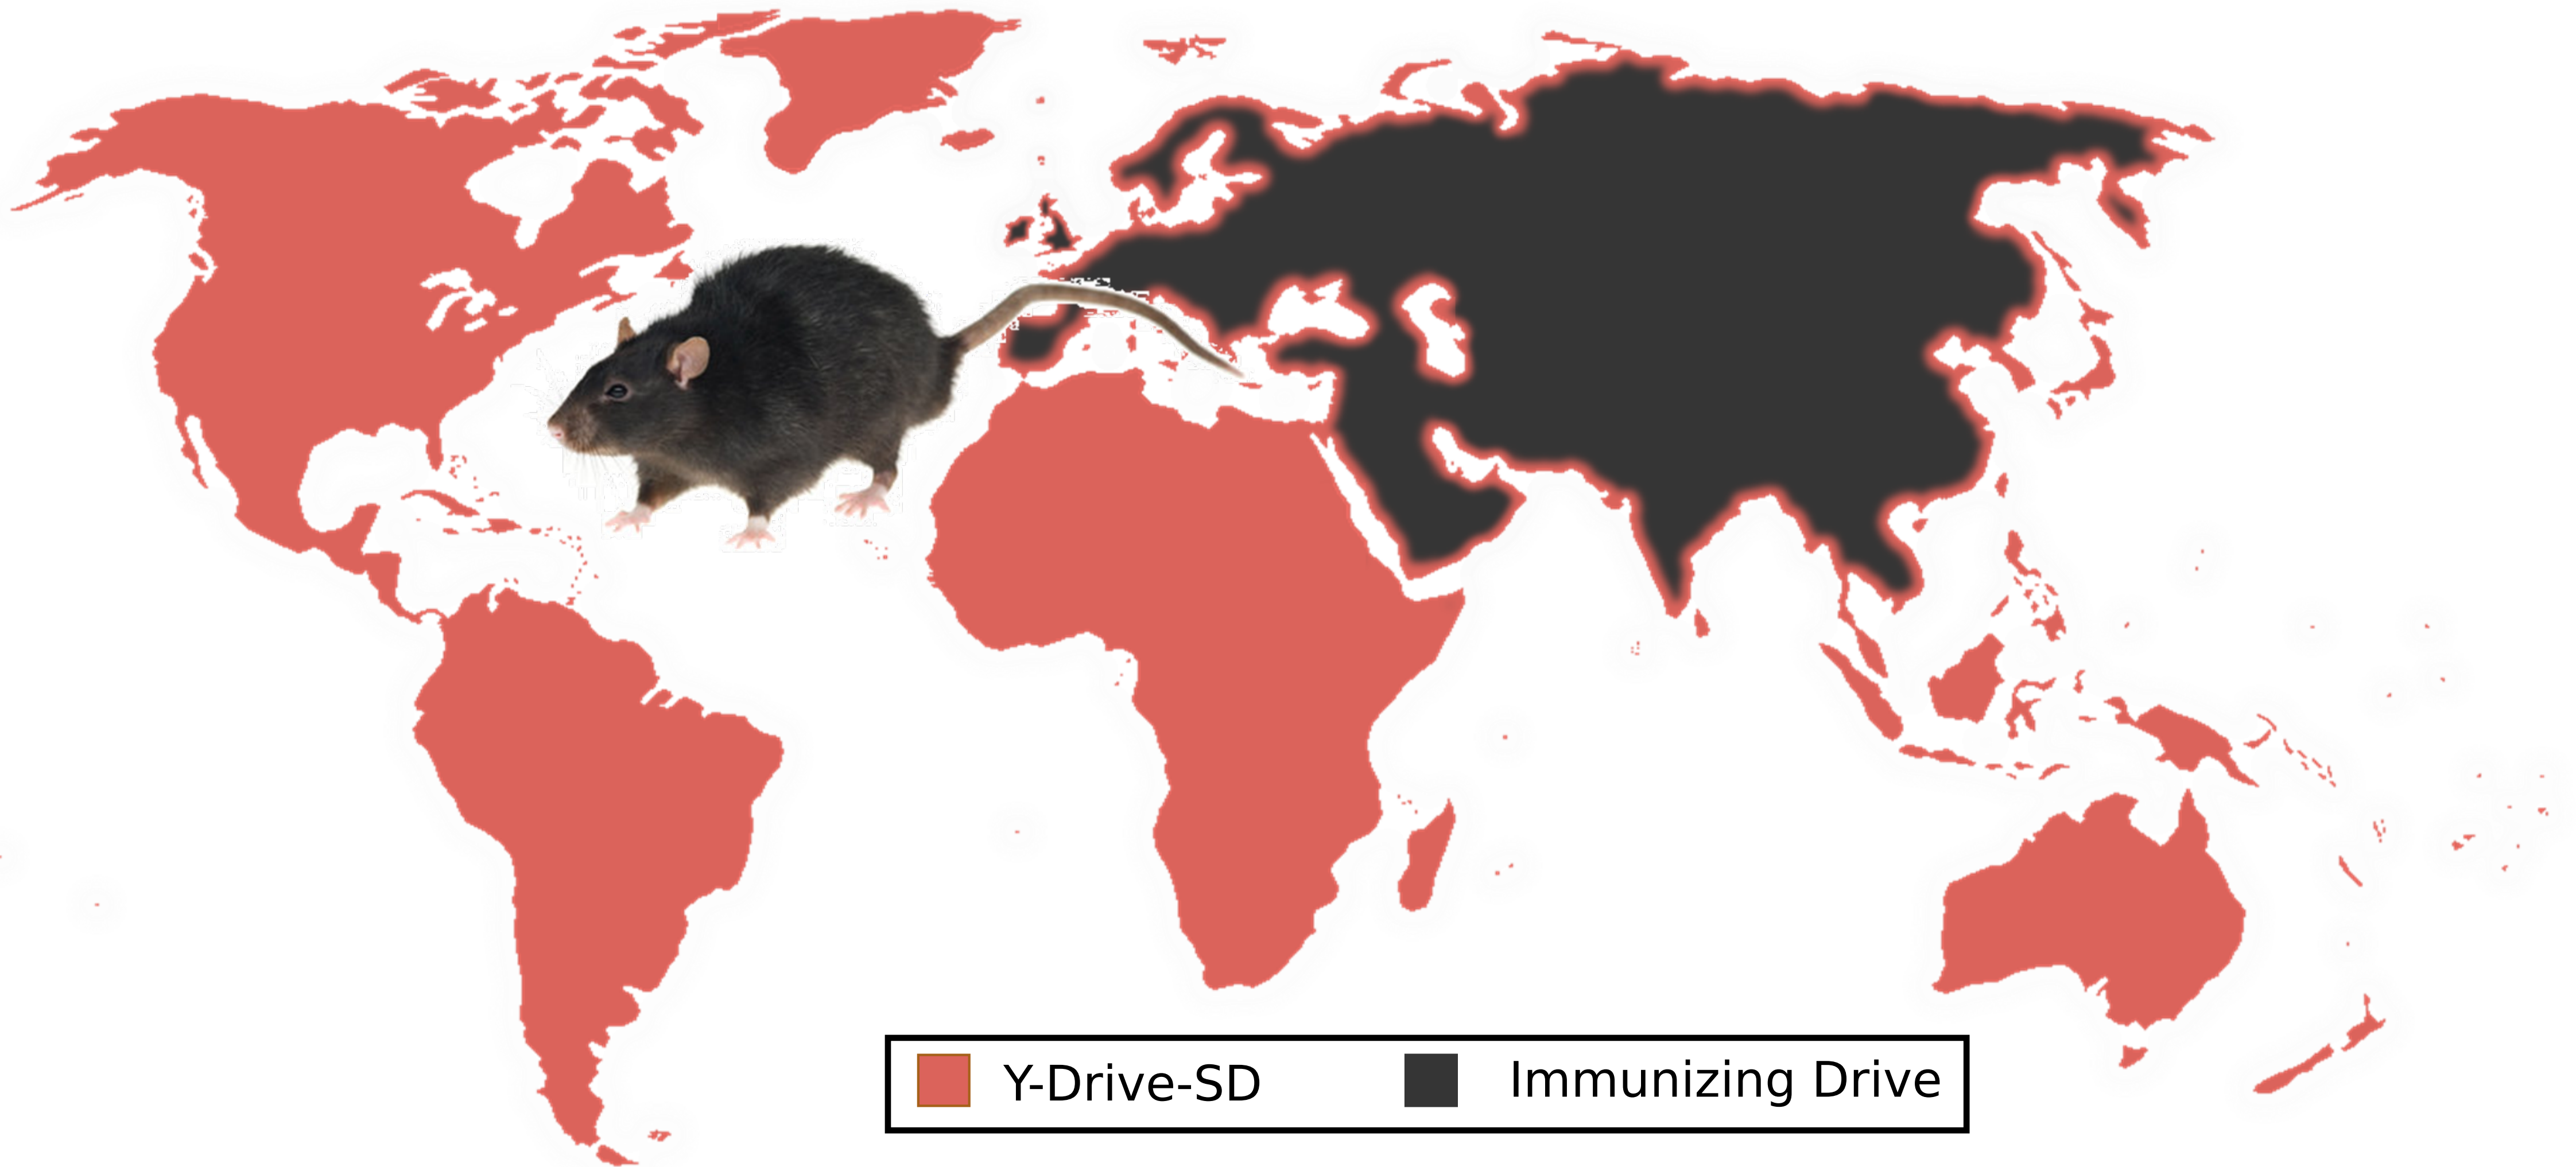

Supplement: supp [file elife-03401-supp-v2.zip]

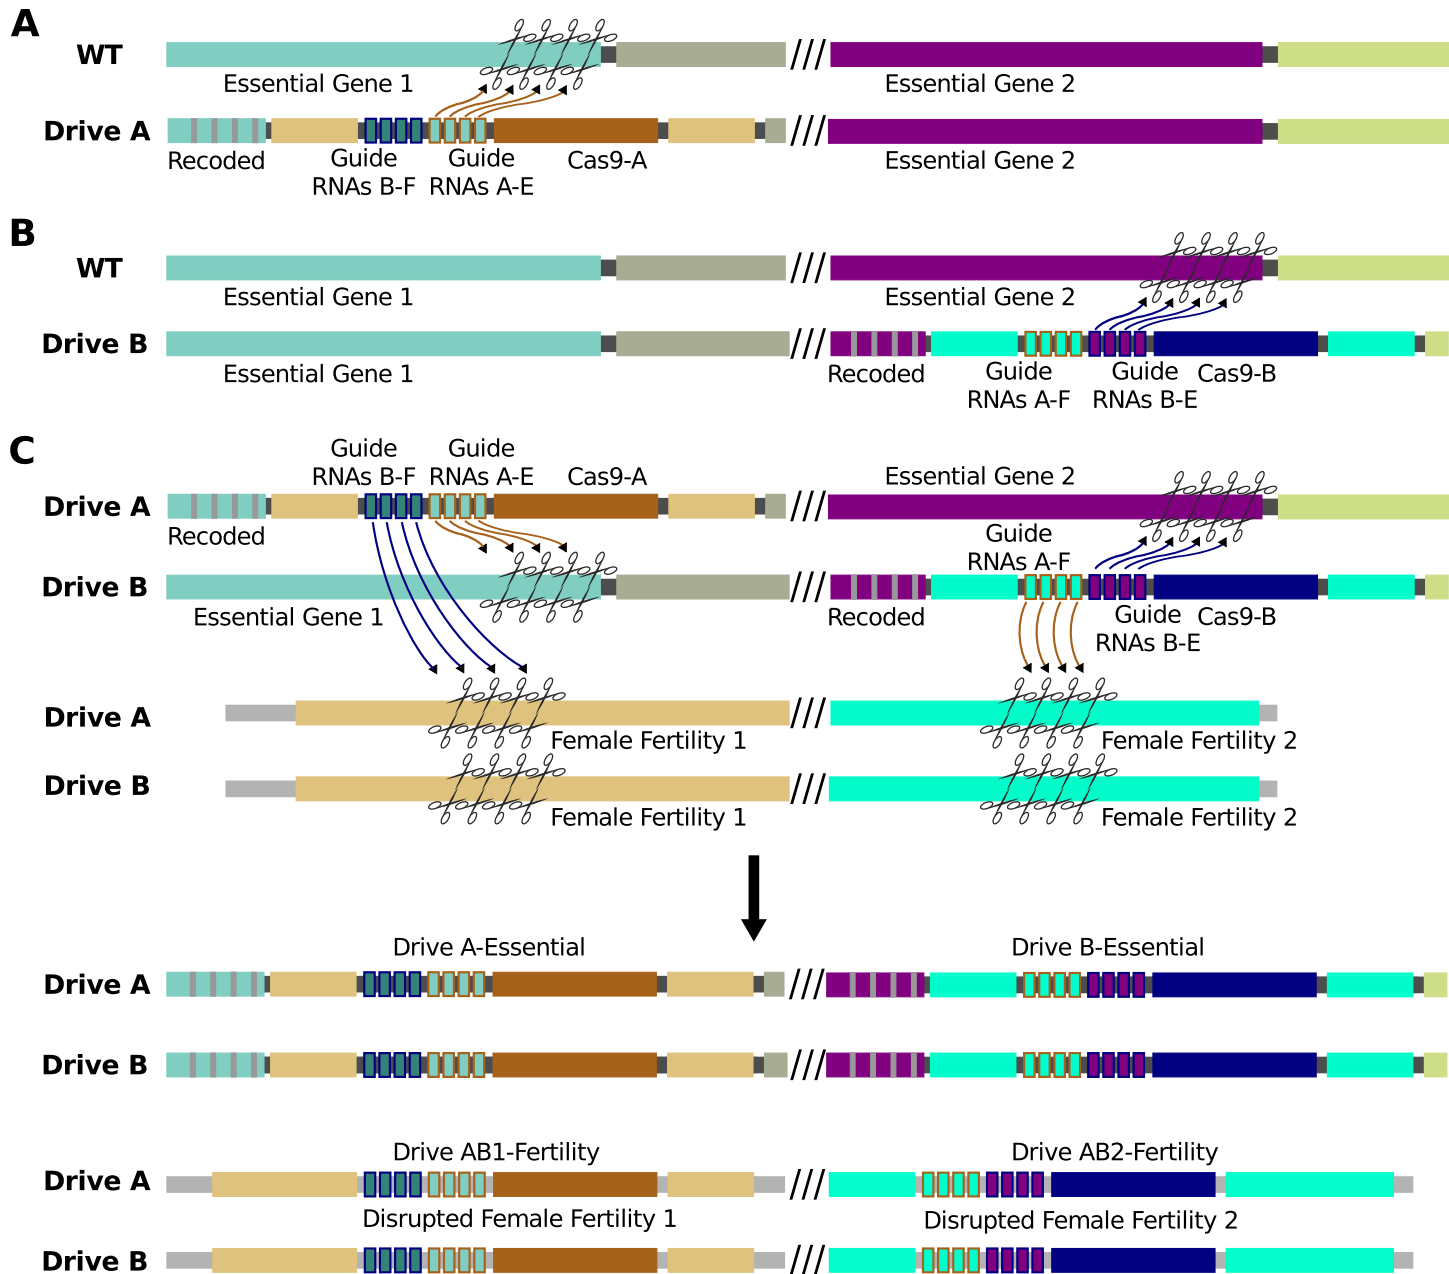

Supplement: supp [file elife-03401-supp-v2.zip]

**A**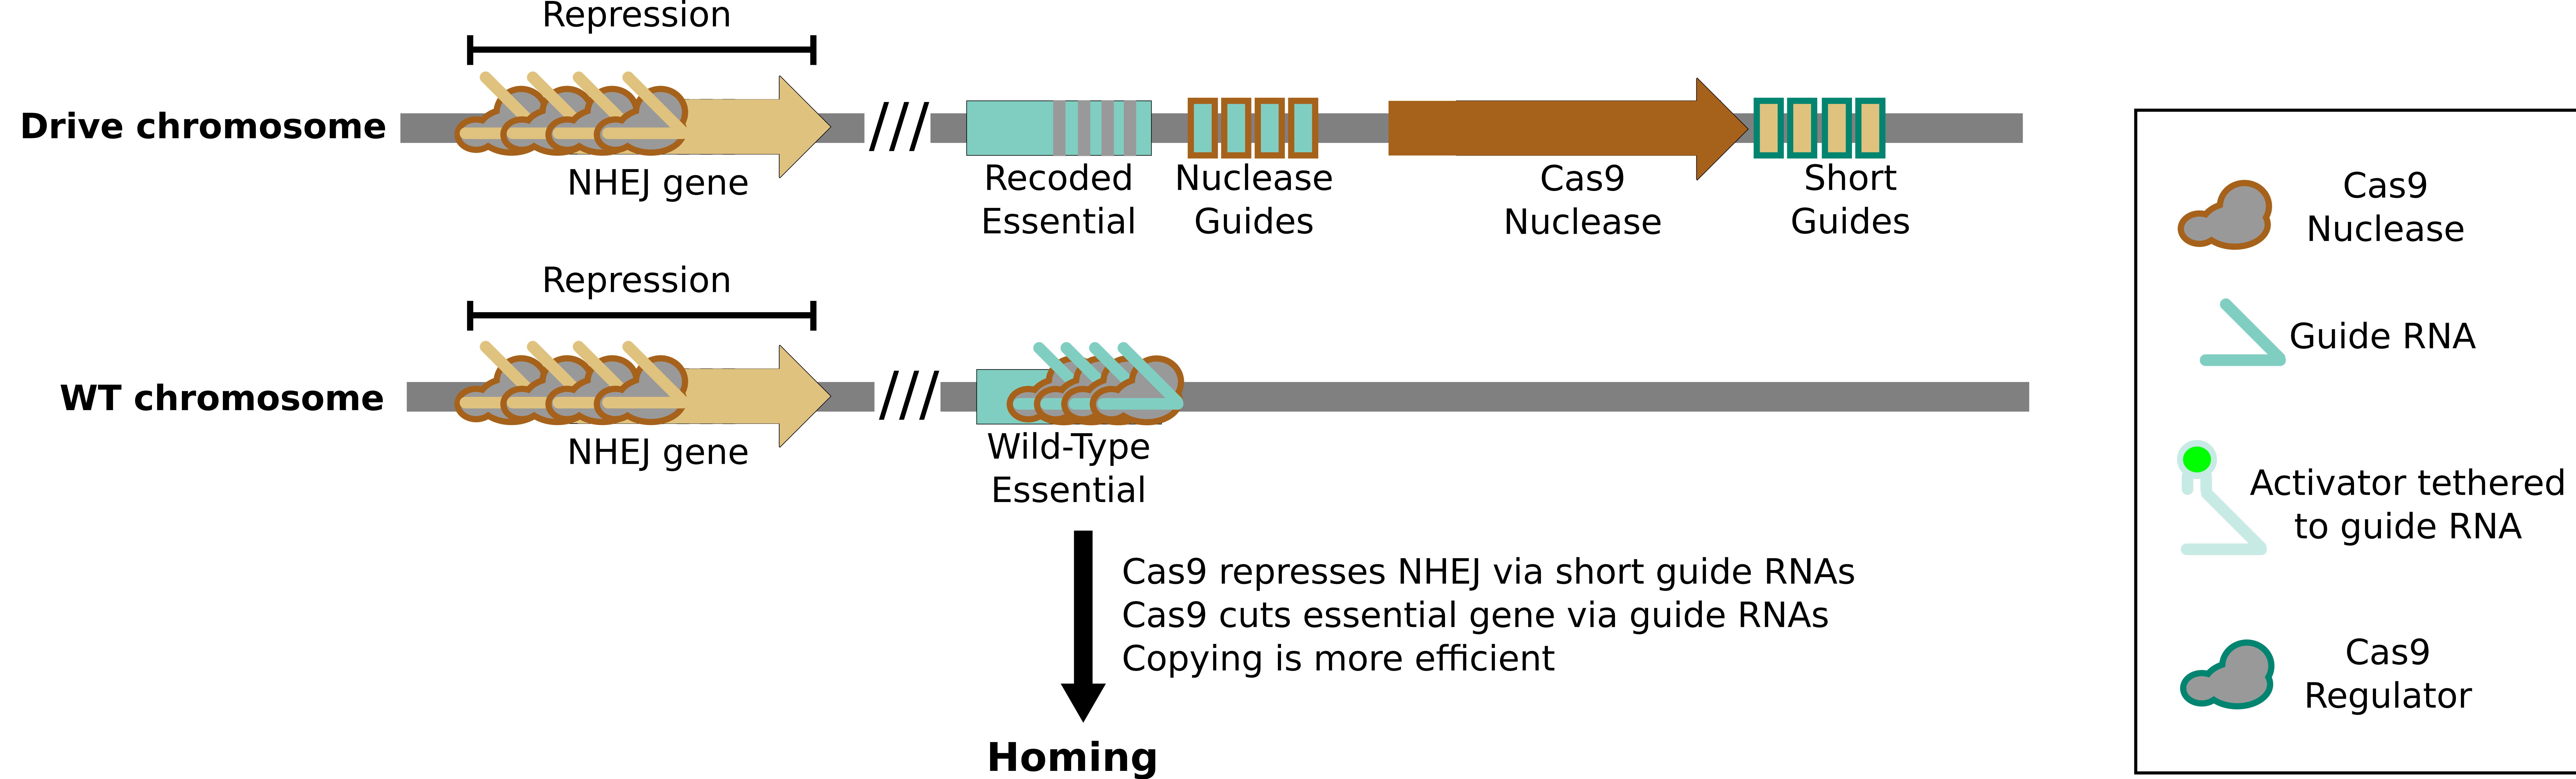**B**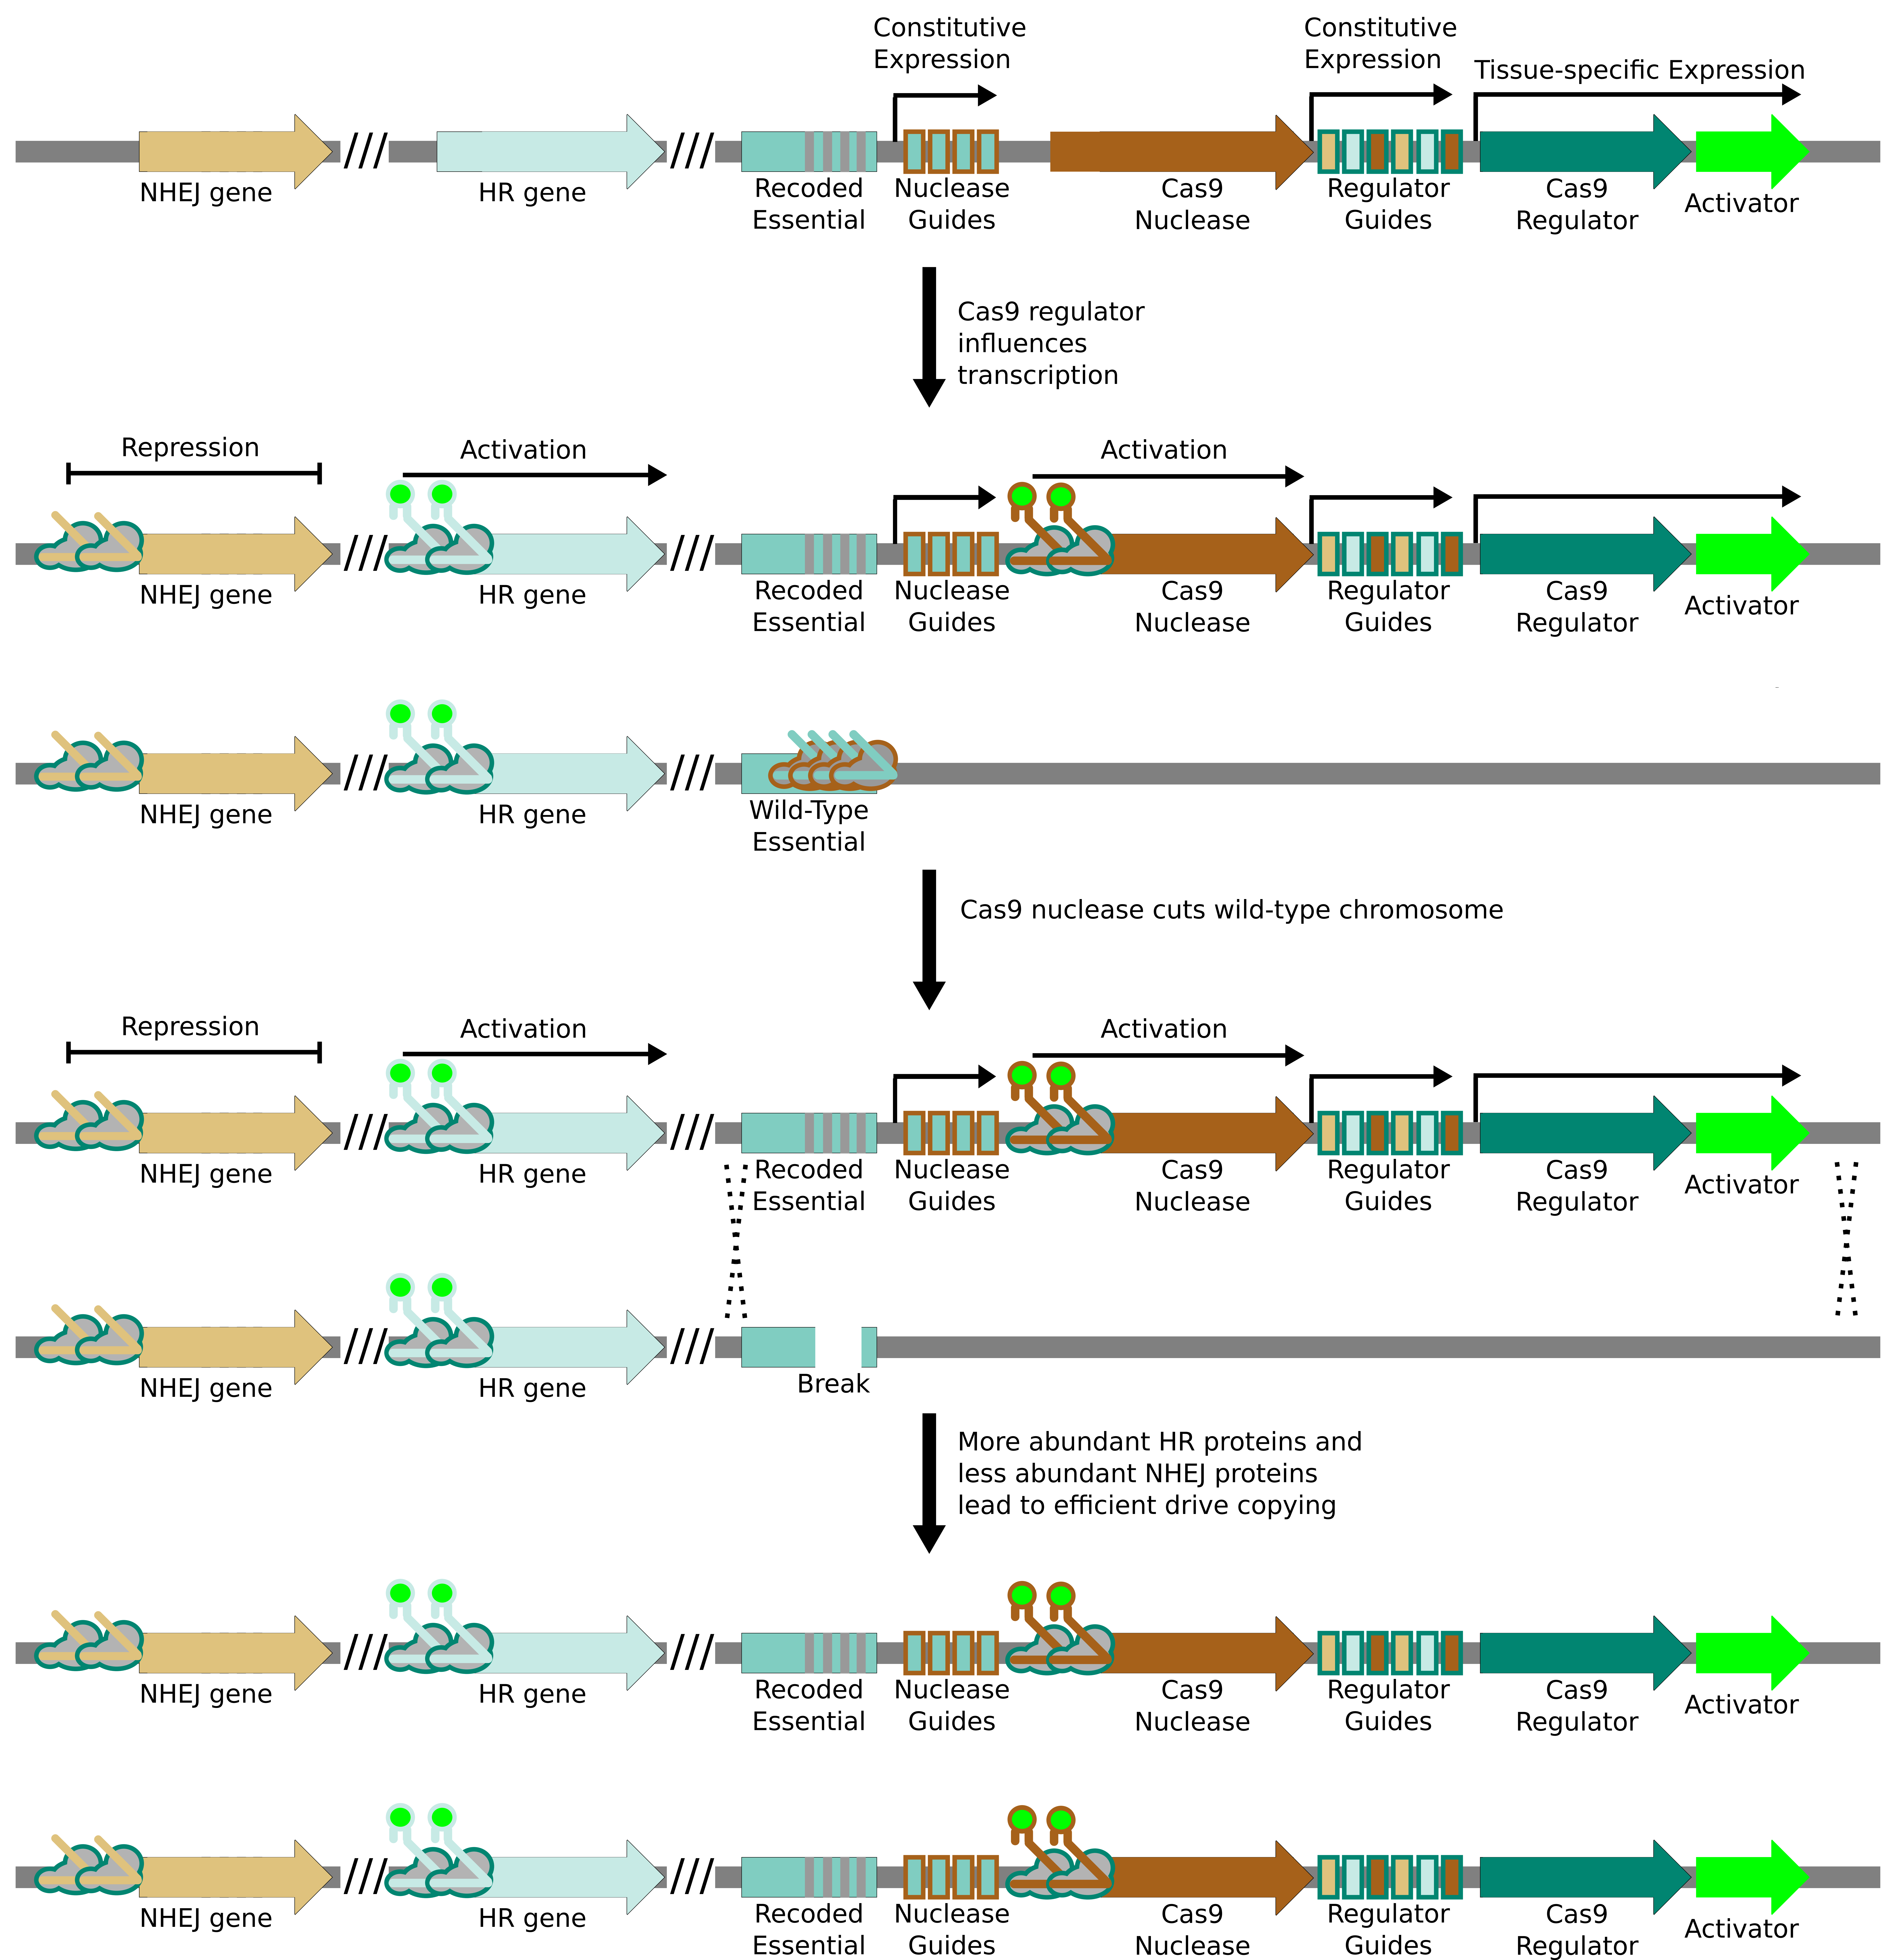

Supplement: supp [file elife-03401-supp-v2.zip]

**A**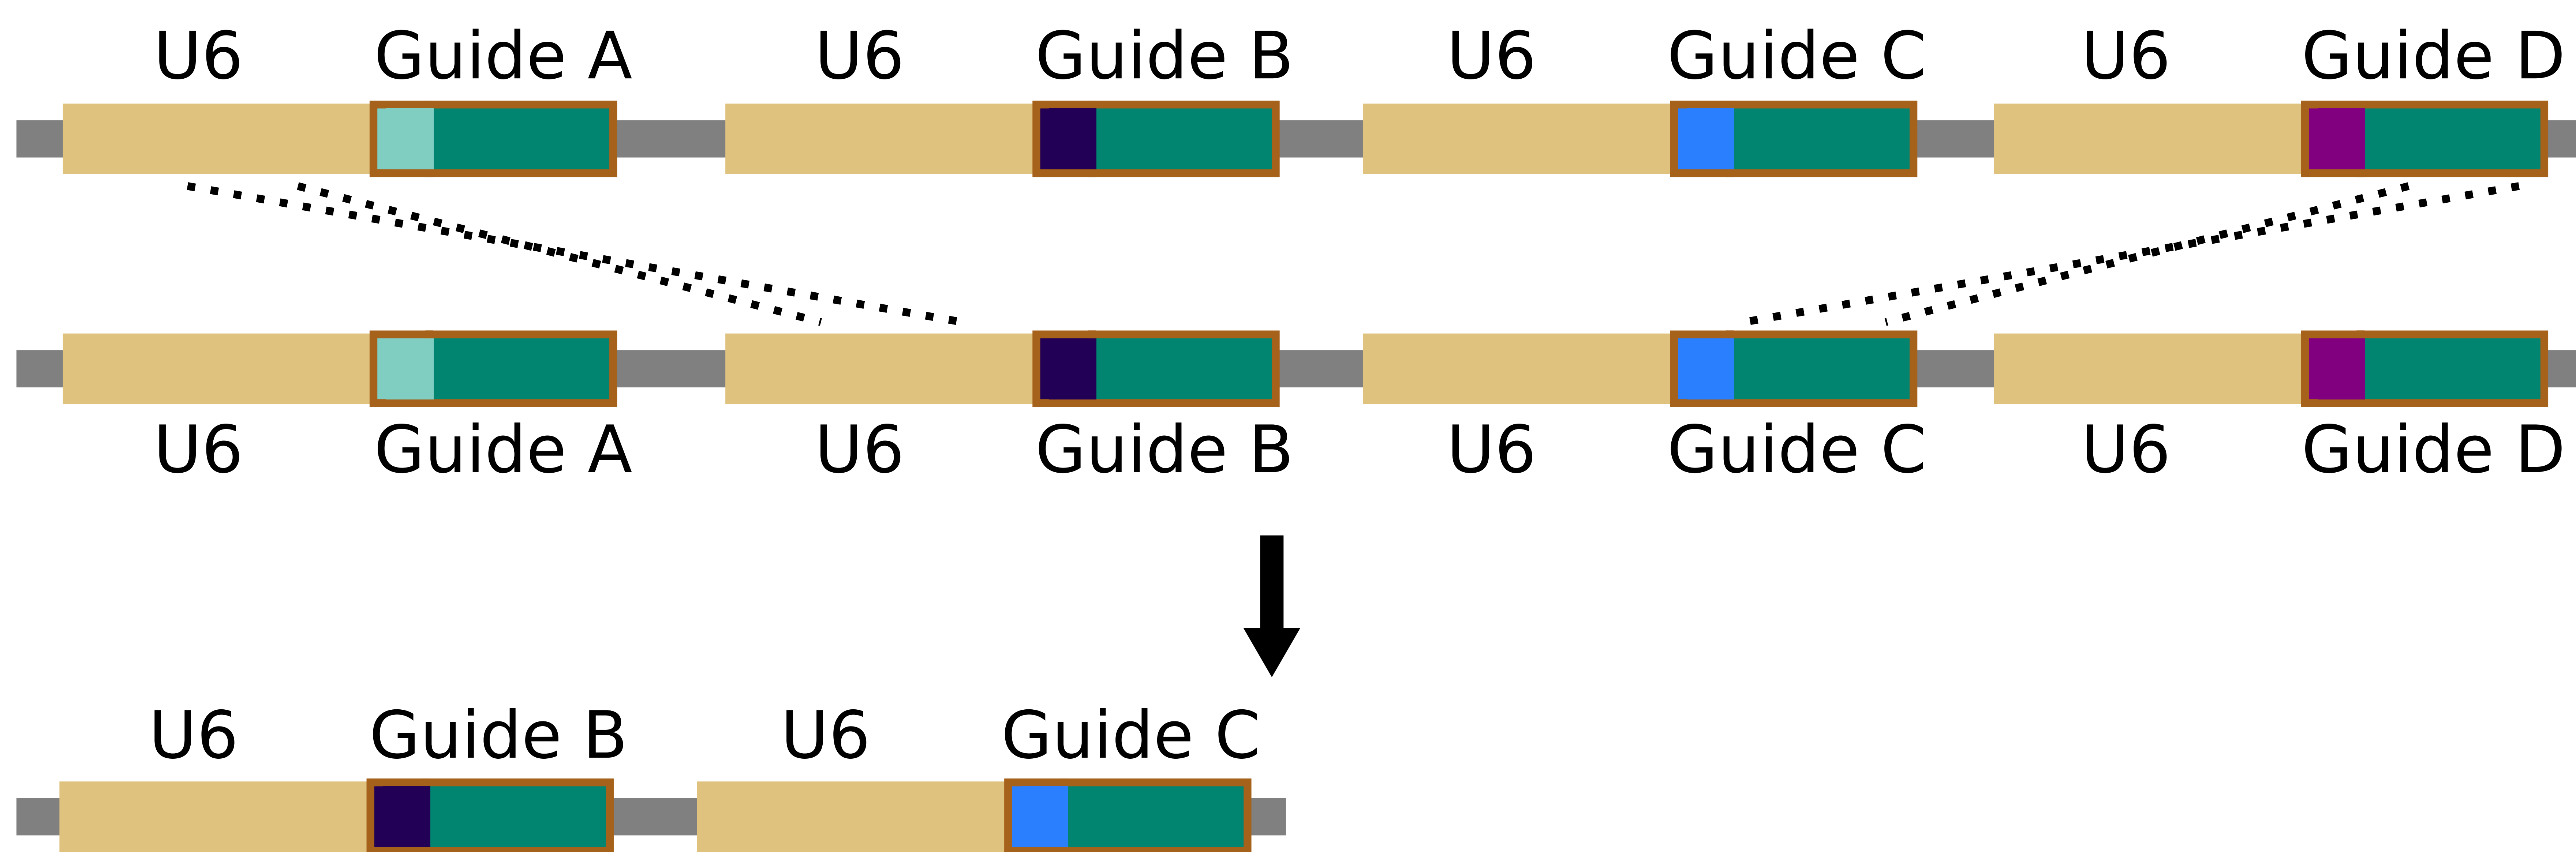**B**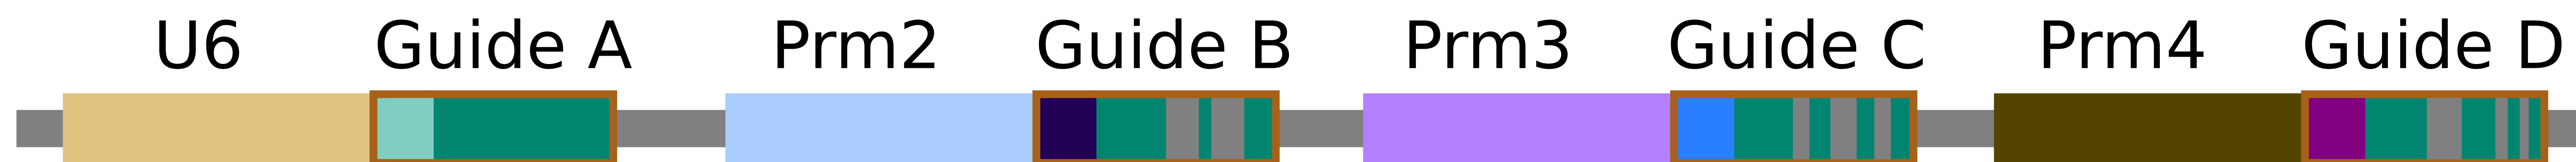**C**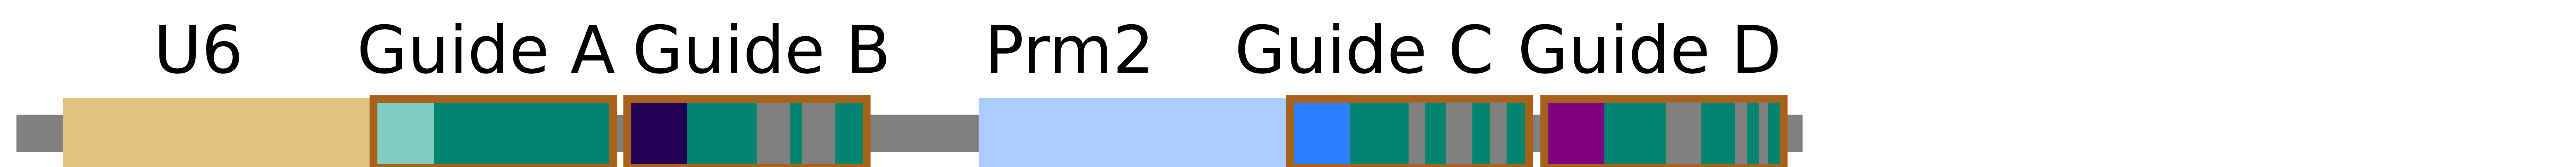**D**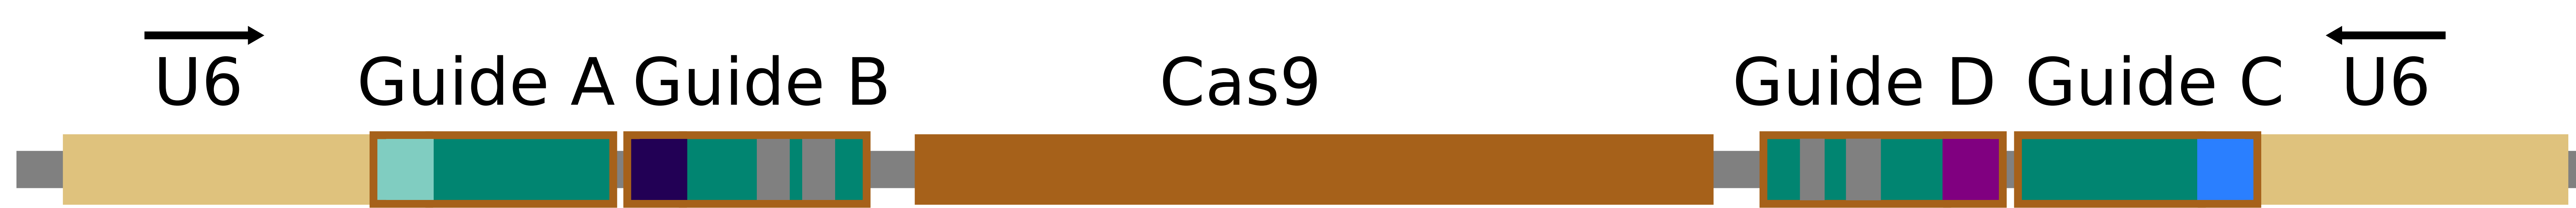

Supplement: supp [file elife-03401-supp-v2.zip]
